# Supplementary material for: A highly luminescent lanthanide-functionalized covalent organic framework for rapid and specific detection of 7-methylguanine for DNA methylation assessment
Source: Royal Society of Chemistry journal article supplement (doi:10.1039/d4bm01018c), 2024-01-01
Supplement: d4bm01018c1.pdf [file d4bm01018c1.pdf]

## Supporting information

### **A highly luminescent lanthanide-functionalized covalent organic framework for rapid and specific detection of 7-methylguanine for DNA methylation assessment**

Tao Hu<sup>a</sup>, Ji-Na Hao<sup>\*a</sup>, Yongsheng Li<sup>\*a,b</sup>

<sup>a</sup> Lab of Low-Dimensional Materials Chemistry, Key Laboratory for Ultrafine Materials of Ministry of Education, Frontier Science Center of the Materials Biology and Dynamic Chemistry, Shanghai Engineering Research Center of Hierarchical Nanomaterials, School of Materials Science and Engineering, East China University of Science and Technology, Shanghai, 200237, China.

<sup>b</sup> Key Laboratory for Green Processing of Chemical Engineering of Xinjiang Bingtuan, School of Chemistry and Chemical Engineering, Shihezi University, Shihezi, 832003, P.R. China.

Corresponding authors: [jinahao@ecust.edu.cn](mailto:jinahao@ecust.edu.cn); [ysli@ecust.edu.cn](mailto:ysli@ecust.edu.cn)

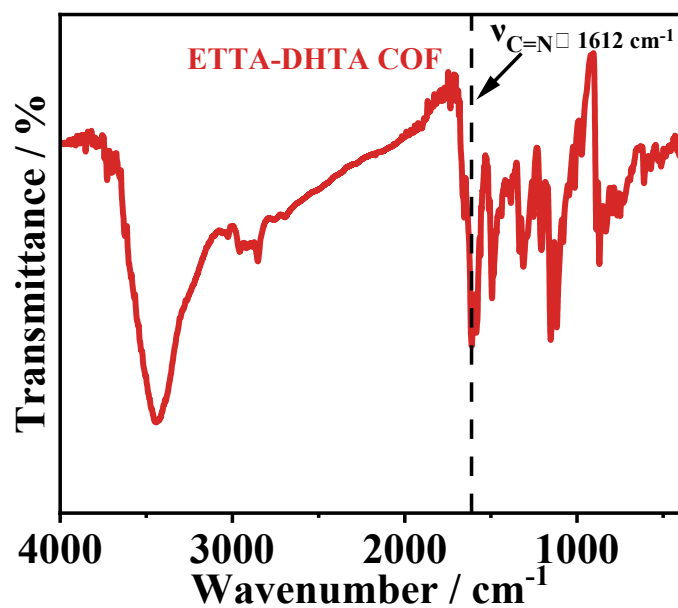

**Fig. S1.** FT-IR spectrum of ETTA-DHTA COF.

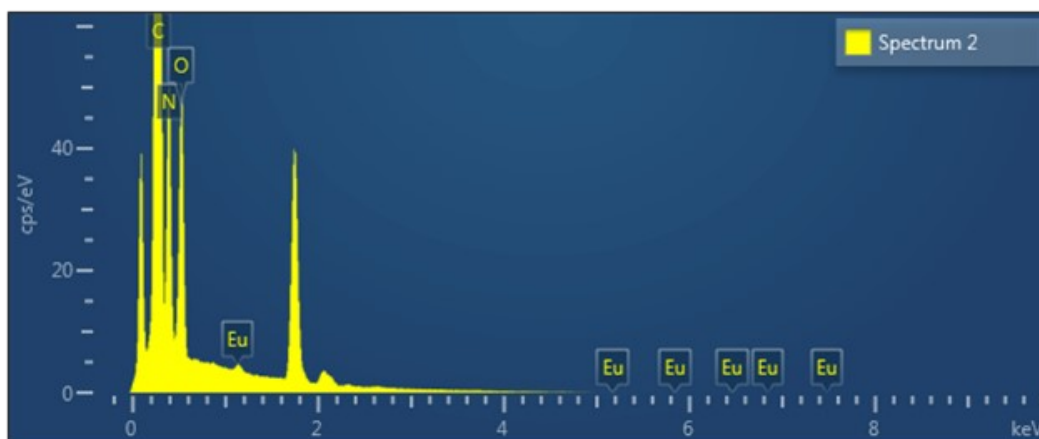

**Fig. S2.** EDX spectrum of DPA/Eu@ETTA-DHTA COF.

**Table S1.** The Eu content in DPA/Eu@ETTA-DHTA COF based on ICP-OES result.

| Samples              | Eu mass |
|----------------------|---------|
| DPA/Eu@ETTA-DHTA COF | 0.67%   |

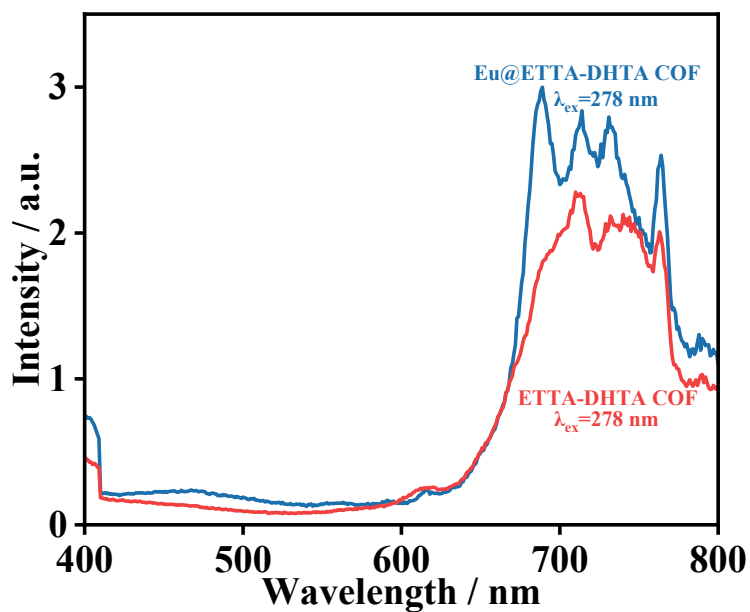

**Fig. S3.** The emission spectra of ETTA-DHTA COF and Eu@ETTA-DHTA.

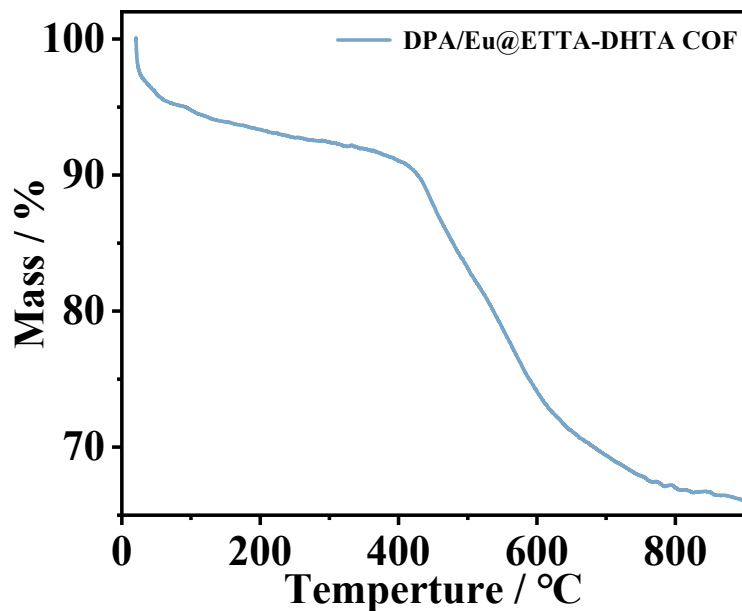

**Fig. S4.** Thermogravimetric analysis of DPA/Eu@ETTA-DHTA COF at temperature range of 20 - 900 °C.

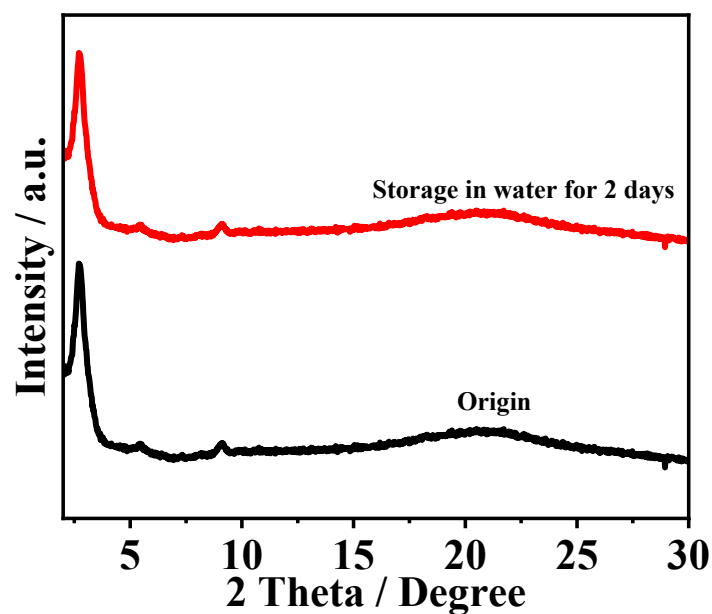

**Fig. S5.** PXRD patterns of DPA/Eu@COF-ETTA-DHTA before and after immersion in pure water for 2 days.

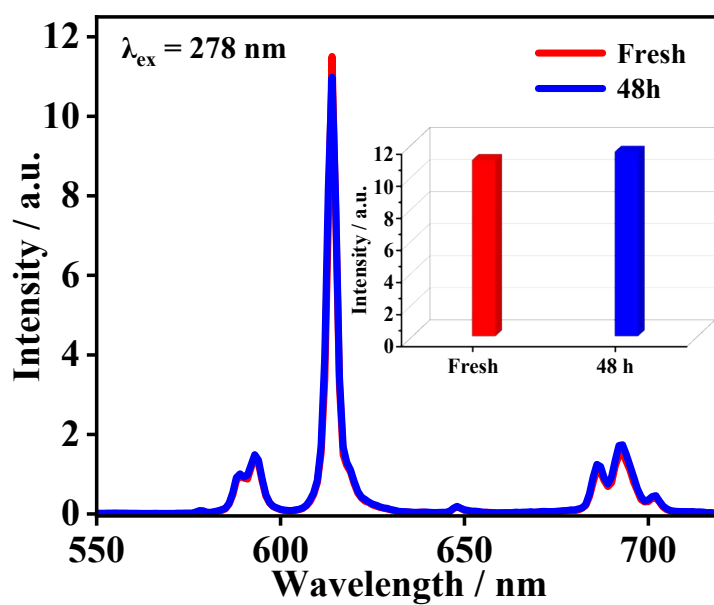

**Fig. S6.** Fluorescence spectra ( $\lambda_{ex} = 278 \text{ nm}$ ) of DPA/Eu@ETTA-DHTA COF before (red) and after (black) storage in water for 48 h.

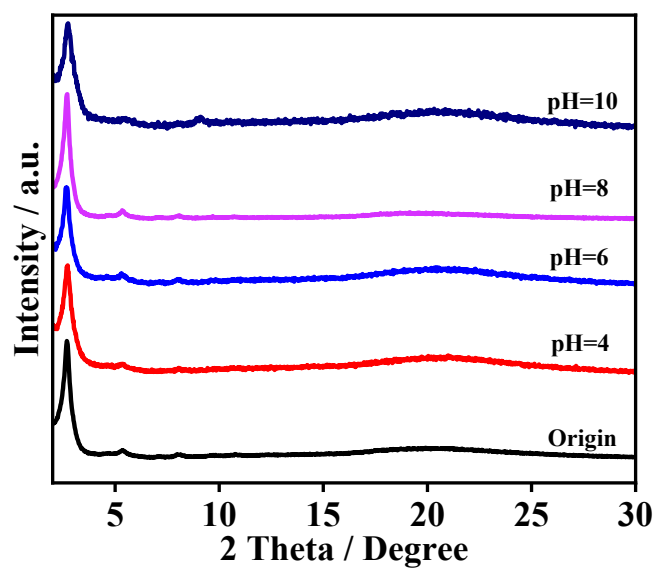

**Fig. S7.** PXRD patterns of DPA/Eu@ETTA-DHTA before and after immersing in aqueous solutions with different pH values for 48 h.

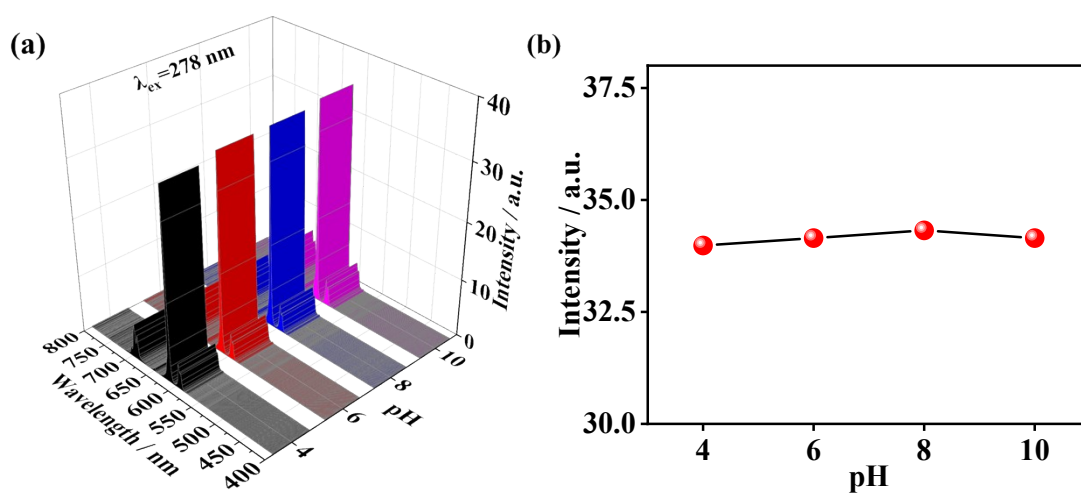

**Fig. S8.** (a) Luminescence spectra and (b) emission intensity (614 nm) of DPA/Eu@ETTA-DHTA in aqueous solutions with different pH values.

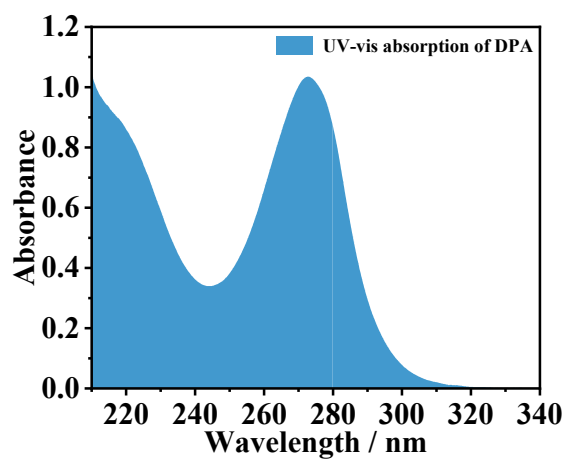

**Fig. S9.** UV-vis adsorption spectrum of DPA.

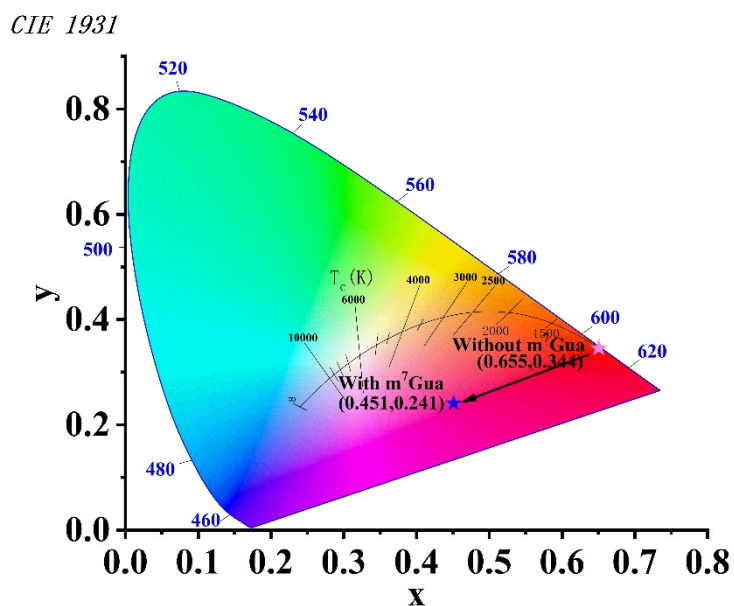

**Fig. S10.** CIE chromaticity diagram of DPA/Eu@ETTA-DHTA COF before and after adding m<sup>7</sup>Gua.

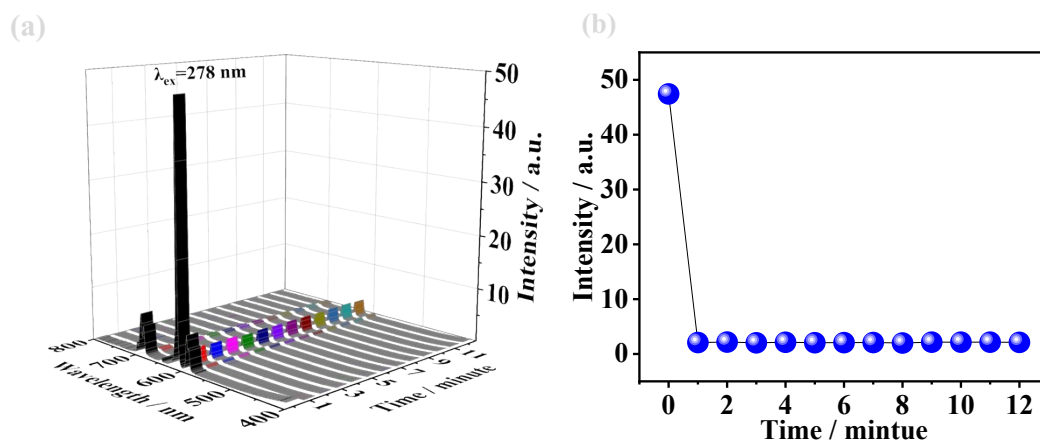

**Fig. S11.** Changes in fluorescence spectra of DPA/Eu@ETTA-DHTA COF (a) and the corresponding intensity at 614 nm (b) over interaction time with m<sup>7</sup>Gua.

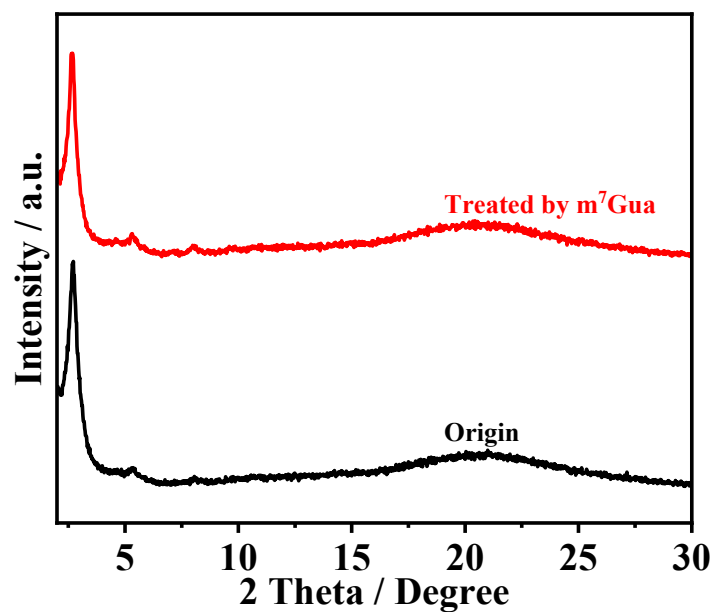

**Fig. S12.** PXRD patterns of DPA/Eu@ETTA-DHTA before and after treated by m<sup>7</sup>Gua for 48 h.

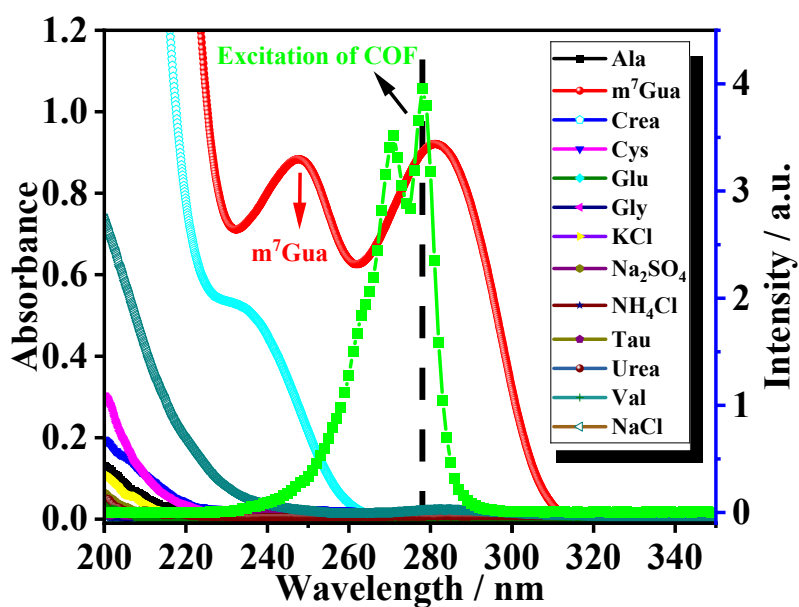

**Fig. S13.** UV-vis spectra of various urine components and the excitation spectrum of DPA/Eu@ETTA-DHTA.

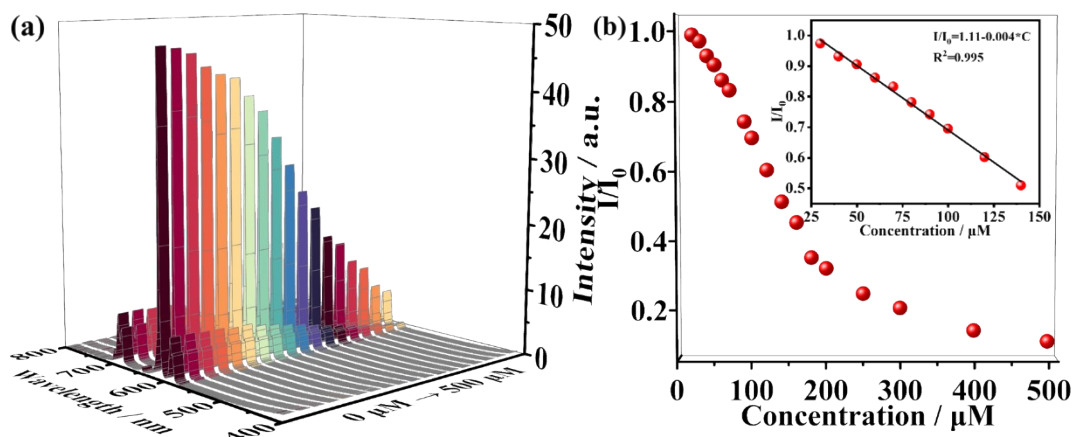

**Fig. S14.** (a) Fluorescence spectra of DPA/Eu@ETTA-DHTA in urine specimen spiked with different concentrations of  $m^7\text{Gua}$  ( $\lambda_{\text{ex}} = 278 \text{ nm}$ ). (b) The relationship between luminescence quenching efficacy ( $I/I_0$ ) and incremental concentration of  $m^7\text{Gua}$  in urine.
